# Supplementary material for: Reduced control of SARS-CoV-2 infection is associated with lower mucosal antibody responses in pregnant women
Source: PubMed Central journal article supplement — medRxiv. 2023 Mar 20:2023.03.19.23287456. Preprint. [Version 1] doi: 10.1101/2023.03.19.23287456 (PMC10055594; doi:10.1101/2023.03.19.23287456), 2023-03-20

**A**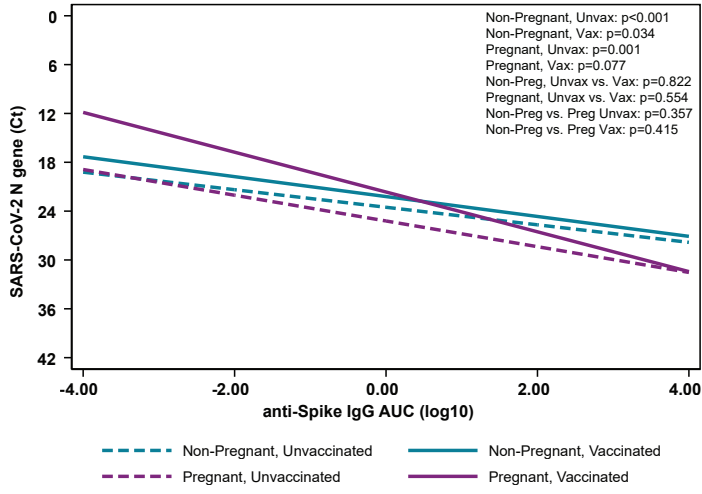**B**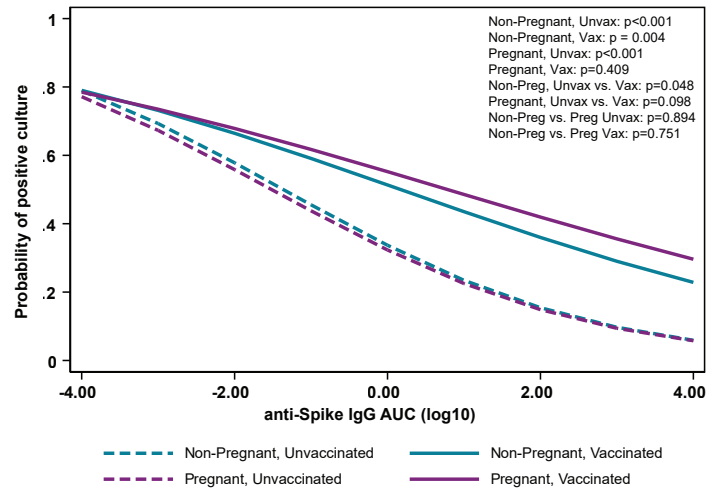**C**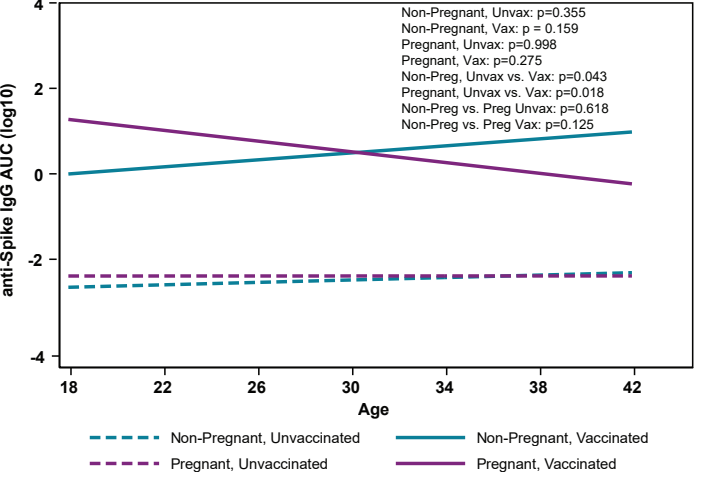**D**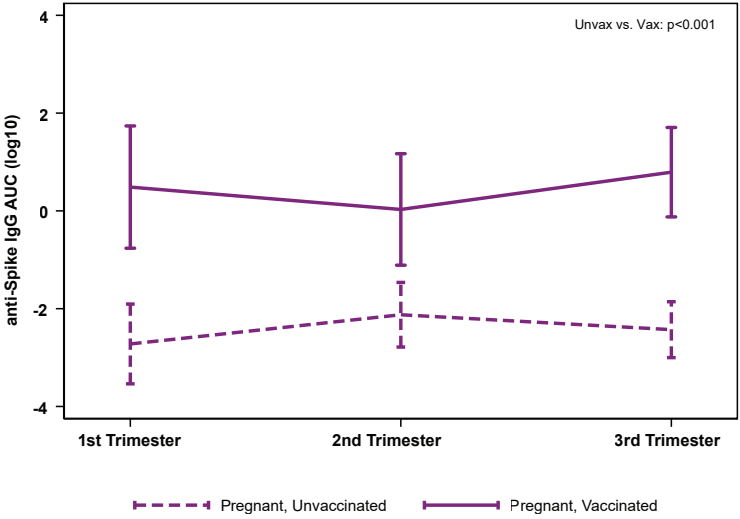

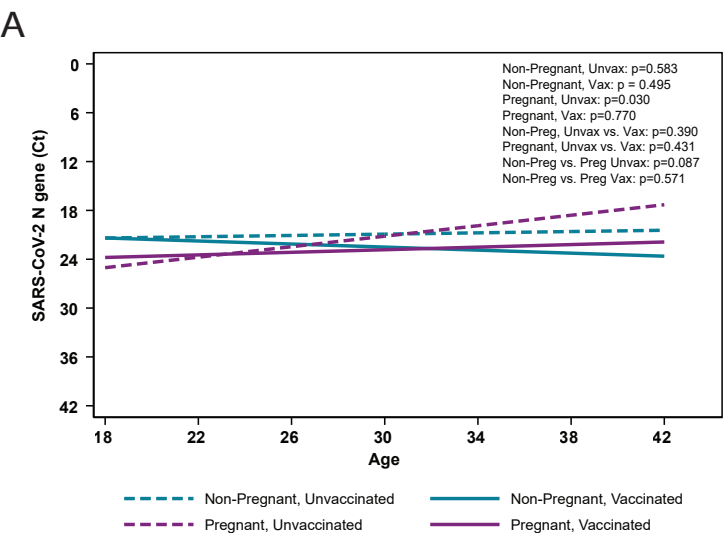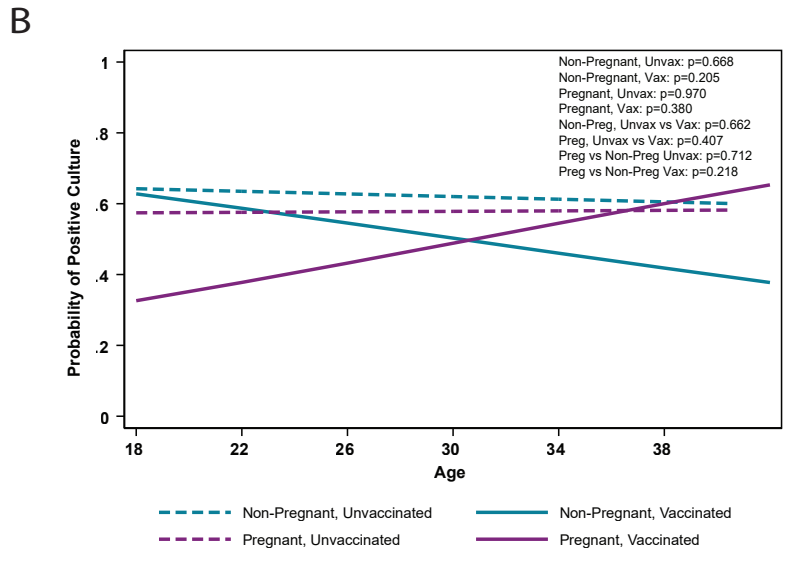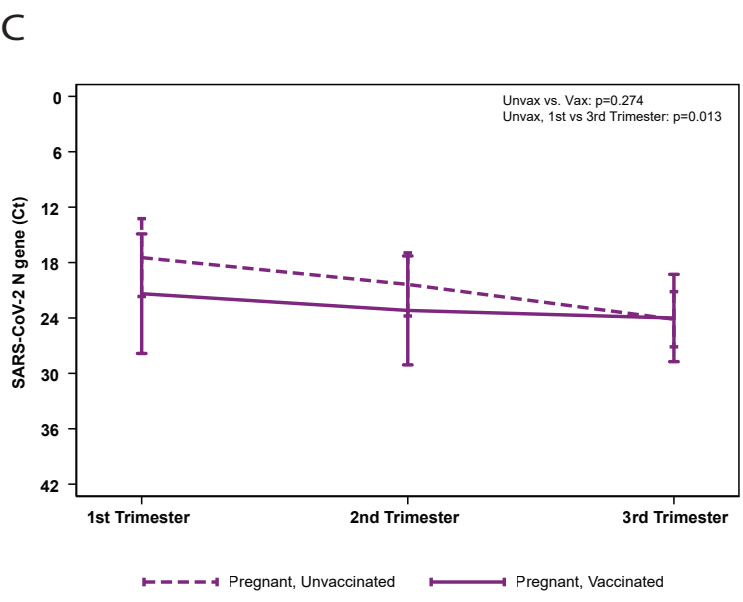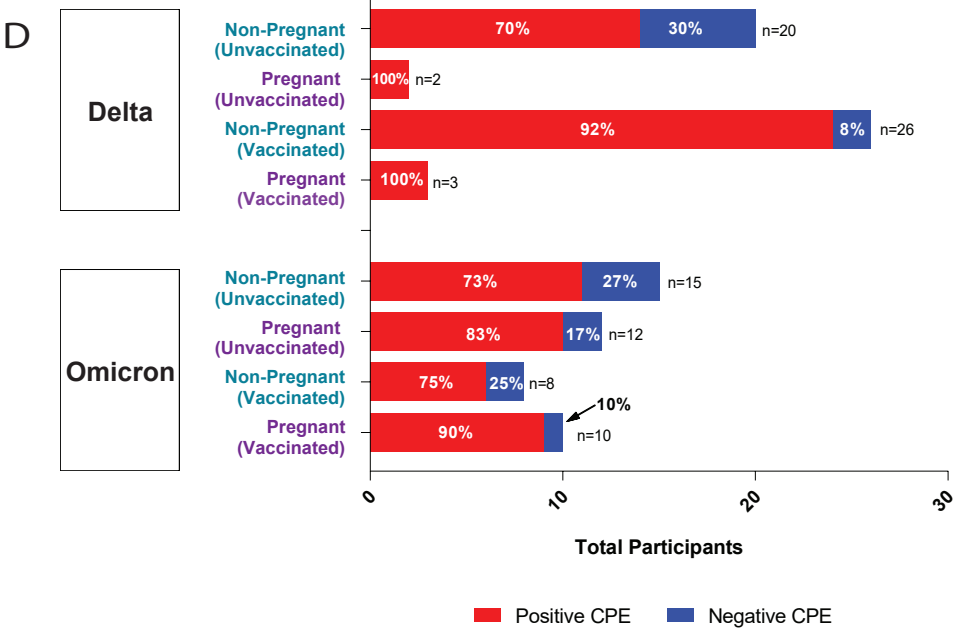

Supplement: media-1.pdf [file media-1.pdf]
